# Supplementary material for: Phylogenetic Heatmaps Highlight Composition Biases in Sequenced Reads
Source: MDPI journal article supplement (doi:10.3390/microorganisms5010004), 2017-01-24
Supplement: s1 [file s1]

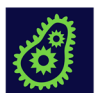

# Supplementary Materials: Phylogenetic Heatmaps Highlight Composition Biases in Sequenced Reads

Sulbha Choudhari and Andrey Grigoriev

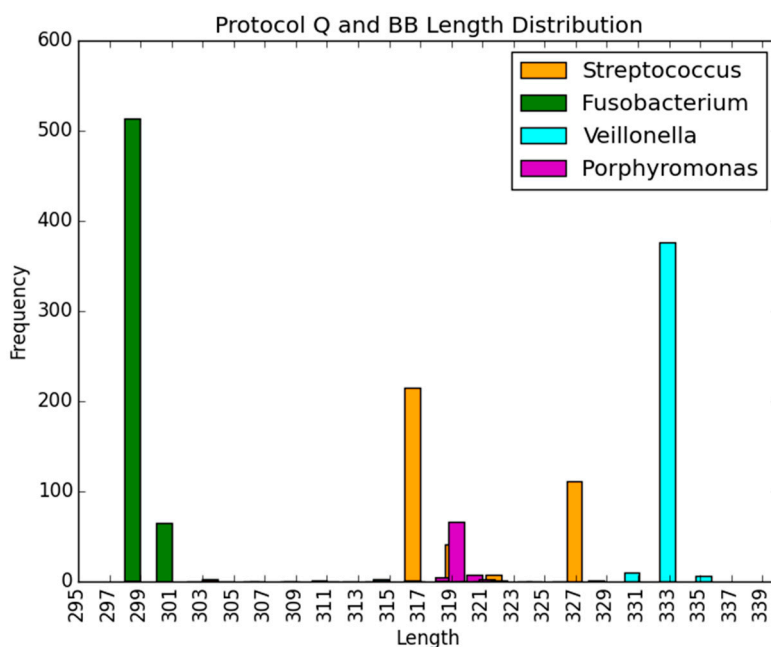

**Figure S1.** Length distribution for the samples in Figure 1 (colors as in Figure 1). Two peaks for *Streptococcus* correspond to the two species.

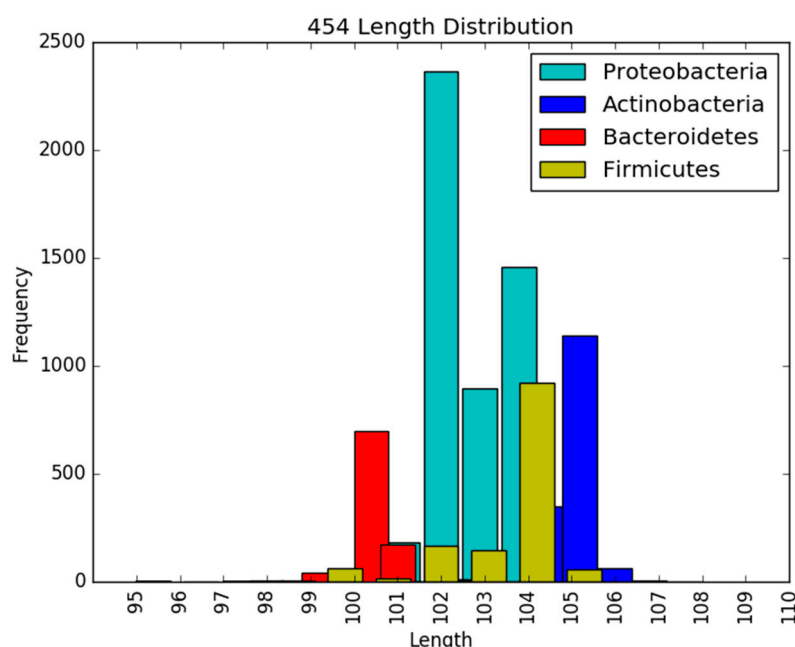

**Figure S2.** Length distribution for the 454 sample in Figure 6 (colors as in Figure 6B).

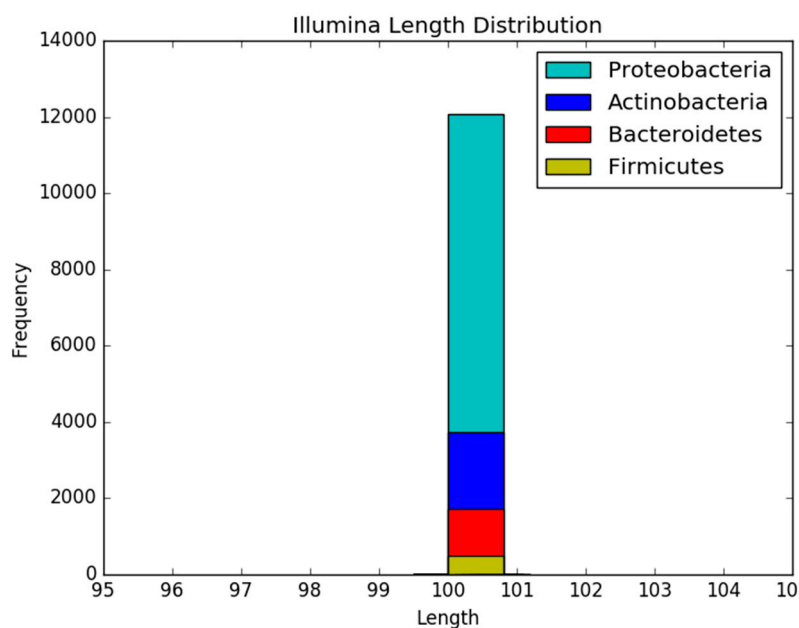

**Figure S3.** Length distribution for the Illumina sample in Figure 5 (colors as in Figure 5B).

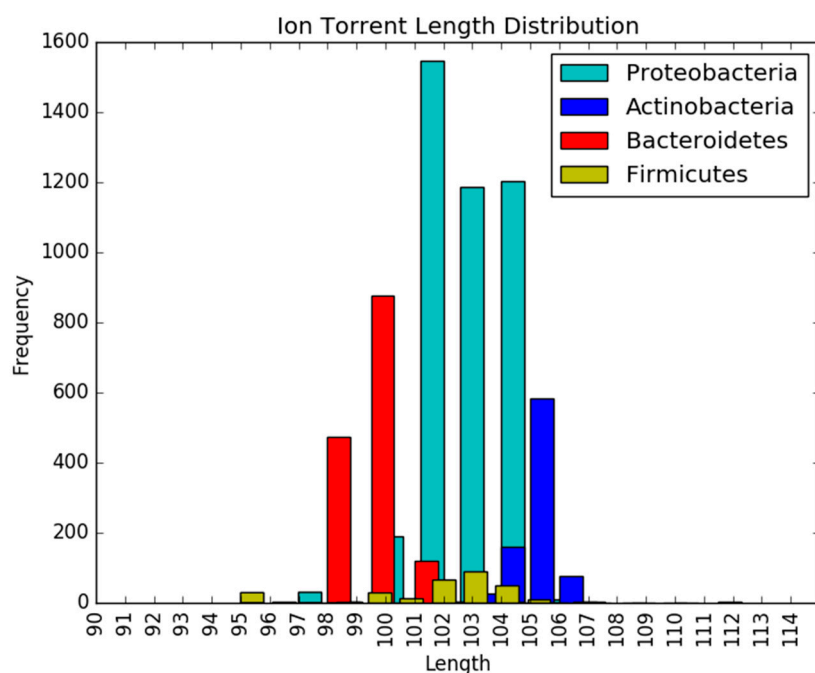

**Figure S4.** Length distribution for the Ion Torrent sample in Figures 5 and 6 (colors as in Figures 5B and 6B).

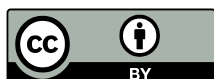

© 2017 by the authors. Submitted for possible open access publication under the terms and conditions of the Creative Commons Attribution (CC BY) license (<http://creativecommons.org/licenses/by/4.0/>).
